# Supplementary material for: Measurement report: Variations in surface SO 2 and NO x mixing ratios from 2004 to 2016 at a background site in the North China Plain
Source: Copernicus journal article supplement (doi:10.5194/acp-2021-866), 2022-01-10
Supplement: Supplementary file [file acp-2021-866-AC3-supplement.pdf]

## **Response to comments by community # 1**

### **1.What causes the difference in the diurnal variation of NO<sub>x</sub> and SO<sub>2</sub>?**

Response: The differences in diurnal cycle of SO<sub>2</sub> and NO<sub>x</sub> were attributed to emissions, meteorological and chemical processes. However, the major reason for the differences in all seasons in this study should be ascribed to apparent different emission sources of these two trace gases.
